# Supplementary material
Source: Springer Nature journal article supplement (https://www.springermedizin.de/resource/supplementary/13000_2011_510_MOESM5_ESM.pdf/9624702)

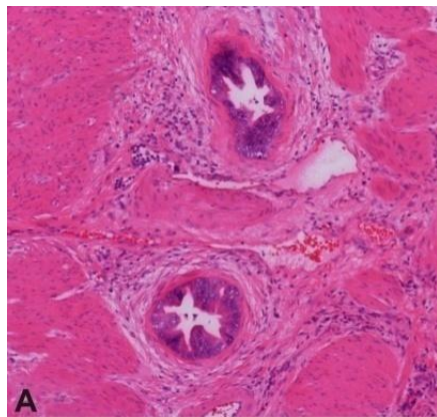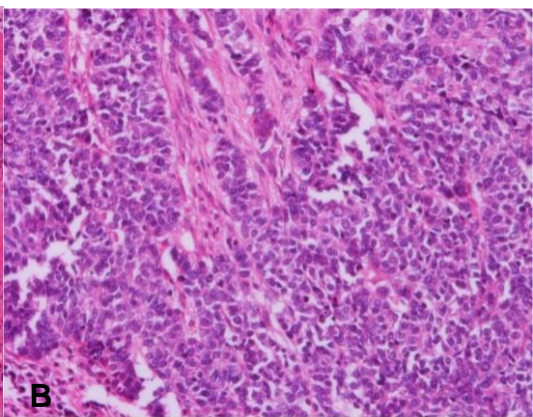

Supplement: MOESM5 [file 9624702]
